# Supplementary material
Source: PubMed Central journal article supplement (PMC8092035)
Supplement: BLT-19-197_Online_supplementary_content.pdf [file BLT-19-197_Online_supplementary_content.pdf]

**ONLINE SUPPLEMENTARY CONTENT****Table S1 - Univariable and multivariable Cox regression overall survival**

| Factor             | Univariable regression |           |       | Multivariable regression |           |       |
|--------------------|------------------------|-----------|-------|--------------------------|-----------|-------|
|                    | HR                     | 95% CI    | p     | HR                       | 95% CI    | p     |
| Age >80            | 1.71                   | 0.95-3.07 | 0.074 | 1.90                     | 1.05-3.44 | 0.034 |
| Gender, female     | 1.71                   | 0.95-3.06 | 0.072 |                          |           |       |
| Diuretic, pre      | 1.76                   | 0.96-3.21 | 0.065 |                          |           |       |
| Diuretic           | 2.30                   | 1.28-4.12 | 0.005 |                          |           |       |
| Cardiovascular     | 1.06                   | 0.49-2.26 | 0.889 |                          |           |       |
| Comorbidity        | 1.19                   | 0.66-2.17 | 0.548 |                          |           |       |
| Transfusion        |                        |           |       |                          |           |       |
| RBC                | 1.00                   | -         | 0.114 |                          |           |       |
| Plasma             | 1.31                   | 0.59-2.94 | 0.507 |                          |           |       |
| TACO               | 1.50                   | 0.64-3.55 | 0.352 |                          |           |       |
| Cirrhosis          | 2.14                   | 1.19-3.84 | 0.011 |                          |           |       |
| TACO and cirrhosis | 2.09                   | 1.17-3.73 | 0.013 | 2.09                     | 1.15-3.78 | 0.015 |

Overall Survival (n=81), Cox regression.

Using multiple regression analysis the factors with  $p < 0.25$  from univariate analysis were selected and the final model was obtained by means of likelihood ratio test. RBC: red blood cells; HR: hazard ratio; 95% CI: confidence interval 95%.
